# Supplementary material for: CombiCTx: screening diffusion gradients of anti-cancer drug combinations
Source: Royal Society of Chemistry journal article supplement (doi:10.1039/d5lc00686d), 2026-01-01
Supplement: d5lc00686d2.xlsx [file d5lc00686d2.xlsx]

## Sheet: Fig. 2E
Fig. 2E
Profile distance (um)	TRITC (Start)	TRITC (End)	FITC (Start)	FITC (End)
0	1008.21	10417	62657.2	65532.3
10.003	1008.44	10450.5	62671.4	65532.3
20.006	1008.66	10484	62684.6	65532.3
30.008	1008.88	10517.6	62696.9	65532.3
40.011	1009.09	10551.2	62708	65532.2
50.014	1009.36	10584.9	62718.4	65532.2
60.017	1009.58	10618.6	62727.5	65532.2
70.02	1009.79	10652.5	62735.9	65532.2
80.022	1010.01	10686.4	62743	65532.2
90.025	1010.22	10720.3	62749.4	65532.1
100.028	1010.46	10754.3	62754.6	65532.1
110.031	1010.68	10788.4	62758.9	65532.1
120.034	1010.91	10822.5	62762.2	65532.2
130.036	1011.13	10856.8	62764.4	65532.2
140.039	1011.38	10891.1	62765.9	65532.3
150.042	1011.61	10925.5	62766.1	65532.3
160.045	1011.85	10959.9	62765.6	65532.3
170.048	1012.08	10994.6	62763.8	65532.2
180.05	1012.32	11029.1	62761.3	65532.2
190.053	1012.54	11063.8	62757.7	65532.2
200.056	1012.77	11098.6	62752.9	65532.2
210.059	1013.01	11133.4	62747.5	65532.1
220.062	1013.26	11168.4	62740.8	65532.1
230.064	1013.54	11203.4	62733.2	65532.1
240.067	1013.82	11238.5	62724.6	65532.1
250.07	1014.1	11273.7	62715	65532
260.073	1014.36	11309.1	62704.4	65532
270.076	1014.56	11344.5	62693	65532
280.078	1014.8	11379.9	62680.3	65531.9
290.081	1015.07	11415.5	62666.9	65531.9
300.084	1015.32	11451.2	62652.2	65531.9
310.087	1015.59	11487	62636.7	65531.8
320.09	1015.91	11522.9	62620.1	65531.8
330.092	1016.19	11558.9	62602.5	65531.8
340.095	1016.44	11595.1	62584	65531.7
350.098	1016.69	11631.3	62564.3	65531.7
360.101	1016.94	11667.6	62543.8	65531.6
370.104	1017.25	11704	62522.1	65531.6
380.106	1017.57	11740.6	62499.6	65531.5
390.109	1017.86	11777.3	62475.8	65531.5
400.112	1018.11	11814.1	62451.3	65531.4
410.115	1018.38	11851	62425.7	65531.4
420.118	1018.72	11888.1	62398.9	65531.3
430.12	1019.03	11925.3	62371.3	65531.3
440.123	1019.34	11962.6	62342.5	65531.2
450.126	1019.59	12000.1	62312.8	65531.1
460.129	1019.94	12037.7	62282	65531.1
470.132	1020.27	12075.4	62250.2	65531
480.134	1020.55	12113.3	62217.2	65531
490.137	1020.87	12151.3	62183.5	65530.9
500.14	1021.23	12189.4	62148.5	65530.8
510.143	1021.53	12227.8	62112.5	65530.7
520.146	1021.84	12266.3	62075.5	65530.6
530.148	1022.2	12304.9	62037.5	65530.6
540.151	1022.52	12343.7	61998.5	65530.5
550.154	1022.9	12382.7	61958.2	65530.4
560.157	1023.25	12421.8	61917	65530.3
570.16	1023.57	12461	61874.8	65530.2
580.162	1023.95	12500.5	61831.5	65530.1
590.165	1024.31	12540.1	61787	65530
600.168	1024.67	12580	61741.6	65529.9
610.171	1025.06	12620	61695	65529.8
620.174	1025.39	12660.1	61647.5	65529.6
630.176	1025.81	12700.5	61598.9	65529.5
640.179	1026.18	12741.1	61549	65529.4
650.182	1026.56	12781.8	61498.3	65529.3
660.185	1026.95	12822.7	61446.3	65529.2
670.188	1027.37	12863.8	61393.4	65529
680.19	1027.8	12905.1	61339.2	65528.9
690.193	1028.19	12946.7	61284.1	65528.7
700.196	1028.61	12988.4	61227.7	65528.6
710.199	1029.02	13030.3	61170.5	65528.4
720.202	1029.47	13072.4	61112	65528.2
730.204	1029.9	13114.8	61052.3	65528
740.207	1030.34	13157.4	60991.8	65527.9
750.21	1030.8	13200.2	60929.8	65527.7
760.213	1031.22	13243.2	60867	65527.5
770.216	1031.69	13286.5	60802.9	65527.3
780.218	1032.15	13330	60737.8	65527
790.221	1032.64	13373.7	60671.5	65526.8
800.224	1033.12	13417.6	60604.2	65526.6
810.227	1033.56	13461.8	60535.6	65526.4
820.23	1034.1	13506.2	60465.8	65526.1
830.232	1034.53	13550.8	60395.2	65525.9
840.235	1035.06	13595.8	60323.1	65525.6
850.238	1035.57	13640.9	60250.1	65525.3
860.241	1036.11	13686.3	60175.8	65525
870.244	1036.6	13732	60100.5	65524.7
880.246	1037.13	13777.9	60023.8	65524.4
890.249	1037.64	13824.1	59946.3	65524.1
900.252	1038.22	13870.5	59867.3	65523.7
910.255	1038.75	13917.2	59787.4	65523.4
920.258	1039.26	13964.1	59706.2	65523
930.26	1039.85	14011.4	59623.8	65522.6
940.263	1040.4	14058.9	59540.4	65522.2
950.266	1040.97	14106.6	59455.6	65521.8
960.269	1041.57	14154.7	59369.9	65521.4
970.272	1042.13	14203.1	59282.7	65521
980.274	1042.74	14251.7	59194.6	65520.5
990.277	1043.33	14300.5	59105.1	65520
1000.28	1043.92	14349.7	59014.6	65519.5
1010.28	1044.53	14399.1	58922.7	65519
1020.29	1045.15	14448.9	58829.9	65518.4
1030.29	1045.74	14498.9	58735.7	65518
1040.29	1046.4	14549.2	58640.3	65517.3
1050.29	1047.05	14599.8	58543.8	65516.7
1060.3	1047.63	14650.7	58446	65516.1
1070.3	1048.29	14701.9	58347.1	65515.5
1080.3	1048.95	14753.4	58246.9	65514.8
1090.31	1049.63	14805.2	58145.6	65514.1
1100.31	1050.26	14857.3	58042.9	65513.4
1110.31	1050.95	14909.7	57939.2	65512.7
1120.31	1051.63	14962.4	57834.2	65511.9
1130.32	1052.32	15015.4	57727.9	65511.1
1140.32	1052.95	15068.7	57620.6	65510.2
1150.32	1053.62	15122.4	57511.9	65509.4
1160.33	1054.37	15176.3	57402.1	65508.5
1170.33	1055.09	15230.4	57290.9	65507.6
1180.33	1055.74	15285	57178.7	65506.7
1190.33	1056.44	15339.9	57065	65505.7
1200.34	1057.18	15395	56950.4	65504.6
1210.34	1057.94	15450.5	56834.4	65503.6
1220.34	1058.68	15506.3	56717.1	65502.5
1230.34	1059.38	15562.3	56598.8	65501.4
1240.35	1060.11	15618.8	56479	65500.2
1250.35	1060.84	15675.5	56358.2	65498.9
1260.35	1061.6	15732.5	56236	65497.7
1270.36	1062.37	15789.9	56112.7	65496.4
1280.36	1063.13	15847.5	55988.1	65495.1
1290.36	1063.85	15905.5	55862.3	65493.7
1300.36	1064.57	15963.8	55735.3	65492.3
1310.37	1065.36	16022.4	55606.9	65490.8
1320.37	1066.17	16081.3	55477.4	65489.2
1330.37	1066.96	16140.4	55346.8	65487.6
1340.38	1067.74	16200	55214.8	65486
1350.38	1068.51	16259.9	55081.5	65484.3
1360.38	1069.27	16320	54947.2	65482.5
1370.38	1070.04	16380.5	54811.4	65480.7
1380.39	1070.84	16441.2	54674.7	65478.8
1390.39	1071.66	16502.3	54536.5	65476.9
1400.39	1072.47	16563.7	54397.2	65474.9
1410.39	1073.27	16625.4	54256.6	65472.8
1420.4	1074.07	16687.4	54114.9	65470.6
1430.4	1074.85	16749.7	53971.9	65468.4
1440.4	1075.62	16812.2	53827.6	65466.1
1450.41	1076.44	16875.2	53682.3	65463.7
1460.41	1077.27	16938.4	53535.6	65461.3
1470.41	1078.11	17001.9	53387.7	65458.9
1480.41	1078.93	17065.7	53238.6	65456.2
1490.42	1079.74	17129.8	53088.4	65453.6
1500.42	1080.58	17194.1	52936.9	65450.8
1510.42	1081.41	17258.8	52784.3	65448
1520.43	1082.2	17323.8	52630.4	65445
1530.43	1082.98	17389.1	52475.3	65442
1540.43	1083.85	17454.6	52319	65438.8
1550.43	1084.66	17520.4	52161.6	65435.5
1560.44	1085.51	17586.6	52003	65432.3
1570.44	1086.36	17652.9	51843.1	65428.8
1580.44	1087.2	17719.5	51682.2	65425.2
1590.44	1088.04	17786.5	51519.9	65421.5
1600.45	1088.88	17853.7	51356.7	65417.8
1610.45	1089.73	17921.2	51192.2	65413.9
1620.45	1090.57	17988.9	51026.5	65409.9
1630.46	1091.4	18056.9	50859.7	65405.8
1640.46	1092.25	18125.1	50691.8	65401.5
1650.46	1093.06	18193.6	50522.8	65397.2
1660.46	1093.86	18262.4	50352.5	65392.8
1670.47	1094.69	18331.4	50181.1	65388.1
1680.47	1095.57	18400.7	50008.6	65383.3
1690.47	1096.41	18470.1	49835	65378.4
1700.48	1097.25	18539.9	49660.3	65373.3
1710.48	1098.09	18609.9	49484.5	65368.2
1720.48	1098.94	18680.1	49307.5	65362.8
1730.48	1099.8	18750.6	49129.6	65357.4
1740.49	1100.65	18821.3	48950.5	65351.7
1750.49	1101.51	18892.2	48770.4	65345.8
1760.49	1102.36	18963.3	48589.1	65339.9
1770.5	1103.2	19034.6	48406.8	65333.7
1780.5	1104.07	19106.2	48223.5	65327.4
1790.5	1104.94	19178	48039.1	65320.9
1800.5	1105.78	19250	47853.7	65314.1
1810.51	1106.69	19322.2	47667.2	65307.2
1820.51	1107.57	19394.6	47479.8	65300.2
1830.51	1108.45	19467.2	47291.3	65292.9
1840.52	1109.35	19539.9	47101.7	65285.5
1850.52	1110.19	19612.9	46911.3	65277.8
1860.52	1111.11	19686.1	46719.8	65269.9
1870.52	1111.95	19759.3	46527.4	65261.8
1880.53	1112.85	19832.9	46334	65253.5
1890.53	1113.77	19906.6	46139.7	65245
1900.53	1114.68	19980.4	45944.4	65236.3
1910.54	1115.6	20054.5	45748.2	65227.3
1920.54	1116.42	20128.6	45551	65218
1930.54	1117.38	20202.9	45353	65208.5
1940.54	1118.36	20277.4	45154.1	65198.8
1950.55	1119.24	20352.1	44954.2	65188.9
1960.55	1120.18	20426.9	44753.6	65178.6
1970.55	1121.12	20501.8	44552	65168.2
1980.56	1122.09	20576.9	44349.6	65157.4
1990.56	1123.01	20652.1	44146.3	65146.4
2000.56	1124	20727.5	43942.3	65135.1
2010.56	1124.96	20802.9	43737.4	65123.6
2020.57	1125.95	20878.5	43531.8	65111.6
2030.57	1127.01	20954.2	43325.3	65099.5
2040.57	1128	21030.1	43118	65087
2050.57	1129.01	21106	42910.1	65074.2
2060.58	1130.02	21182.1	42701.3	65061.2
2070.58	1131.1	21258.3	42491.8	65047.7
2080.58	1132.19	21334.6	42281.6	65034
2090.59	1133.28	21410.9	42070.8	65019.9
2100.59	1134.34	21487.4	41859.1	65005.5
2110.59	1135.51	21564	41646.8	64990.8
2120.59	1136.61	21640.7	41433.9	64975.7
2130.6	1137.77	21717.4	41220.3	64960.3
2140.6	1138.94	21794.2	41006.1	64944.5
2150.6	1140.11	21871.2	40791.3	64928.2
2160.61	1141.34	21948.2	40575.8	64911.7
2170.61	1142.59	22025.2	40359.8	64894.7
2180.61	1143.84	22102.4	40143.2	64877.5
2190.61	1145.09	22179.6	39926.1	64859.8
2200.62	1146.42	22256.8	39708.4	64841.6
2210.62	1147.75	22334.1	39490.2	64823.1
2220.62	1149.14	22411.5	39271.5	64804.2
2230.62	1150.54	22489	39052.3	64784.8
2240.63	1151.93	22566.5	38832.5	64765.1
2250.63	1153.39	22644.1	38612.4	64744.8
2260.63	1154.96	22721.7	38391.8	64724.2
2270.64	1156.49	22799.4	38170.7	64703.2
2280.64	1157.99	22877.1	37949.3	64681.6
2290.64	1159.59	22954.8	37727.5	64659.6
2300.64	1161.24	23032.6	37505.3	64637.2
2310.65	1162.89	23110.4	37282.7	64614.2
2320.65	1164.6	23188.3	37059.8	64590.8
2330.65	1166.36	23266.3	36836.6	64566.9
2340.66	1168.18	23344.2	36613	64542.5
2350.66	1170	23422.2	36389.2	64517.6
2360.66	1171.9	23500.2	36165.1	64492.2
2370.66	1173.84	23578.3	35940.8	64466.3
2380.67	1175.82	23656.3	35716.1	64439.8
2390.67	1177.87	23734.5	35491.4	64412.9
2400.67	1179.97	23812.6	35266.3	64385.4
2410.68	1182.18	23890.7	35041.1	64357.4
2420.68	1184.38	23968.9	34815.8	64328.8
2430.68	1186.67	24047.2	34590.2	64299.6
2440.68	1188.99	24125.5	34364.6	64270
2450.69	1191.39	24203.7	34138.8	64239.6
2460.69	1193.88	24282	33912.9	64208.8
2470.69	1196.39	24360.3	33686.9	64177.4
2480.7	1199.03	24438.7	33460.9	64145.3
2490.7	1201.65	24517.1	33234.9	64112.7
2500.7	1204.47	24595.5	33008.8	64079.5
2510.7	1207.35	24673.9	32782.7	64045.7
2520.71	1210.25	24752.4	32556.7	64011.3
2530.71	1213.22	24830.8	32330.6	63976.2
2540.71	1216.26	24909.4	32104.6	63940.5
2550.71	1219.41	24987.9	31878.6	63904.2
2560.72	1222.69	25066.5	31652.8	63867.2
2570.72	1226.01	25145.1	31427.1	63829.6
2580.72	1229.44	25223.8	31201.4	63791.4
2590.72	1232.97	25302.4	30976	63752.4
2600.73	1236.61	25381.1	30750.6	63712.9
2610.73	1240.33	25459.8	30525.6	63672.6
2620.73	1244.17	25538.7	30300.5	63631.6
2630.74	1248.14	25617.5	30075.8	63590
2640.74	1252.17	25696.4	29851.2	63547.7
2650.74	1256.29	25775.3	29627	63504.8
2660.74	1260.58	25854.3	29402.9	63461
2670.75	1264.97	25933.3	29179.1	63416.6
2680.75	1269.48	26012.3	28955.7	63371.5
2690.75	1274.15	26091.5	28732.5	63325.7
2700.76	1278.91	26170.6	28509.7	63279.1
2710.76	1283.78	26249.9	28287.2	63231.8
2720.76	1288.85	26329.2	28065.2	63183.8
2730.76	1294	26408.5	27843.5	63135
2740.77	1299.28	26488	27622.2	63085.6
2750.77	1304.69	26567.4	27401.2	63035.3
2760.77	1310.29	26647.1	27180.8	62984.3
2770.78	1316.05	26726.7	26960.7	62932.6
2780.78	1321.93	26806.4	26741.1	62880.1
2790.78	1327.94	26886.3	26522.1	62826.8
2800.78	1334.15	26966.3	26303.5	62772.8
2810.79	1340.49	27046.3	26085.4	62718
2820.79	1347.03	27126.4	25867.9	62662.4
2830.79	1353.74	27206.6	25651	62606
2840.8	1360.64	27286.9	25434.5	62548.9
2850.8	1367.66	27367.3	25218.6	62490.9
2860.8	1374.88	27447.9	25003.4	62432.2
2870.8	1382.28	27528.6	24788.7	62372.7
2880.81	1389.86	27609.4	24574.7	62312.4
2890.81	1397.64	27690.3	24361.3	62251.3
2900.81	1405.64	27771.4	24148.5	62189.4
2910.82	1413.79	27852.6	23936.5	62126.7
2920.82	1422.16	27933.9	23725	62063.2
2930.82	1430.77	28015.5	23514.3	61998.8
2940.82	1439.55	28097.2	23304.3	61933.7
2950.83	1448.57	28179	23095.1	61867.7
2960.83	1457.77	28261	22886.5	61801
2970.83	1467.19	28343.1	22678.8	61733.4
2980.84	1476.87	28425.4	22471.7	61665.1
2990.84	1486.76	28507.9	22265.5	61595.8
3000.84	1496.91	28590.6	22060.1	61525.8
3010.84	1507.33	28673.5	21855.4	61454.9
3020.85	1517.89	28756.5	21651.5	61383.2
3030.85	1528.75	28839.8	21448.6	61310.8
3040.85	1539.89	28923.3	21246.4	61237.4
3050.85	1551.21	29007	21045	61163.4
3060.86	1562.81	29091	20844.6	61088.4
3070.86	1574.7	29175.1	20645	61012.6
3080.86	1586.88	29259.5	20446.4	60936
3090.86	1599.3	29344.1	20248.6	60858.5
3100.87	1611.95	29429	20051.7	60780.3
3110.87	1624.95	29514	19855.7	60701.3
3120.87	1638.22	29599.4	19660.7	60621.4
3130.88	1651.77	29685	19466.6	60540.7
3140.88	1665.68	29770.9	19273.5	60459.2
3150.88	1679.78	29857.1	19081.3	60376.9
3160.89	1694.19	29943.4	18890.1	60293.8
3170.89	1708.93	30030.2	18699.9	60209.8
3180.89	1723.99	30117.2	18510.6	60125.1
3190.89	1739.39	30204.5	18322.5	60039.6
3200.9	1755.1	30292.1	18135.1	59953.2
3210.9	1771.11	30379.9	17949	59866
3220.9	1787.39	30468.1	17763.7	59778.1
3230.91	1804.09	30556.6	17579.6	59689.3
3240.91	1821.08	30645.5	17396.5	59599.8
3250.91	1838.5	30734.7	17214.5	59509.5
3260.91	1856.17	30824.1	17033.5	59418.4
3270.92	1874.25	30913.9	16853.6	59326.5
3280.92	1892.63	31004.2	16674.7	59233.8
3290.92	1911.42	31094.7	16496.9	59140.4
3300.92	1930.53	31185.5	16320.2	59046.3
3310.93	1950.07	31276.8	16144.6	58951.2
3320.93	1969.96	31368.4	15970	58855.5
3330.93	1990.18	31460.3	15796.7	58759
3340.94	2010.84	31552.6	15624.4	58661.8
3350.94	2031.9	31645.3	15453.2	58563.8
3360.94	2053.26	31738.5	15283.1	58465
3370.94	2075.13	31831.9	15114.2	58365.6
3380.95	2097.4	31925.8	14946.4	58265.4
3390.95	2120.02	32020	14779.7	58164.5
3400.95	2143.02	32114.7	14614.2	58062.8
3410.95	2166.55	32209.8	14449.8	57960.5
3420.96	2190.39	32305.3	14286.6	57857.5
3430.96	2214.7	32401.2	14124.5	57753.7
3440.96	2239.48	32497.5	13963.6	57649.2
3450.97	2264.63	32594.2	13803.8	57544.1
3460.97	2290.23	32691.4	13645.2	57438.3
3470.97	2316.29	32789	13487.7	57331.8
3480.97	2342.83	32886.9	13331.5	57224.6
3490.98	2369.78	32985.4	13176.4	57116.8
3500.98	2397.2	33084.3	13022.5	57008.2
3510.98	2425.07	33183.6	12869.7	56899.1
3520.99	2453.44	33283.4	12718.2	56789.3
3530.99	2482.27	33383.6	12567.8	56678.9
3540.99	2511.57	33484.3	12418.5	56567.9
3550.99	2541.36	33585.4	12270.6	56456.1
3561	2571.59	33687	12123.7	56343.8
3571	2602.34	33789	11978.1	56230.9
3581	2633.57	33891.5	11833.5	56117.4
3591.01	2665.3	33994.4	11690.3	56003.3
3601.01	2697.57	34097.8	11548.1	55888.6
3611.01	2730.29	34201.7	11407.2	55773.4
3621.01	2763.5	34306	11267.4	55657.5
3631.02	2797.32	34410.8	11128.9	55541.1
3641.02	2831.65	34516.1	10991.6	55424.1
3651.02	2866.46	34621.9	10855.3	55306.6
3661.03	2901.81	34728.1	10720.3	55188.6
3671.03	2937.72	34834.8	10586.5	55070
3681.03	2974.13	34941.9	10453.9	54950.8
3691.03	3011.07	35049.5	10322.3	54831.2
3701.04	3048.58	35157.6	10192.2	54711.1
3711.04	3086.63	35266.1	10063	54590.4
3721.04	3125.27	35375.1	9935.09	54469.4
3731.05	3164.4	35484.6	9808.31	54347.7
3741.05	3204.12	35594.6	9682.72	54225.6
3751.05	3244.39	35705	9558.33	54103
3761.05	3285.24	35815.9	9435.1	53980
3771.06	3326.63	35927.3	9312.99	53856.5
3781.06	3368.61	36039.1	9192.04	53732.6
3791.06	3411.25	36151.4	9072.33	53608.2
3801.06	3454.45	36264.1	8953.63	53483.4
3811.07	3498.2	36377.4	8836.22	53358.2
3821.07	3542.56	36491	8719.88	53232.6
3831.07	3587.46	36605.1	8604.75	53106.6
3841.07	3633	36719.7	8490.68	52980.1
3851.08	3679.2	36834.7	8377.8	52853.3
3861.08	3725.96	36950.2	8266.02	52726.1
3871.08	3773.28	37066.1	8155.38	52598.5
3881.09	3821.32	37182.5	8045.86	52470.5
3891.09	3869.91	37299.2	7937.48	52342.2
3901.09	3919.11	37416.5	7830.2	52213.5
3911.09	3968.96	37534.2	7724.06	52084.5
3921.1	4019.4	37652.2	7619.04	51955.1
3931.1	4070.49	37770.7	7515.09	51825.4
3941.1	4122.23	37889.7	7412.23	51695.4
3951.11	4174.58	38009	7310.43	51565.1
3961.11	4227.6	38128.8	7209.76	51434.4
3971.11	4281.3	38249	7110.17	51303.5
3981.11	4335.63	38369.5	7011.68	51172.3
3991.12	4390.54	38490.5	6914.23	51040.7
4001.12	4446.21	38611.9	6817.85	50908.9
4011.12	4502.5	38733.6	6722.54	50776.9
4021.13	4559.39	38855.7	6628.27	50644.5
4031.13	4616.94	38978.2	6535.01	50511.8
4041.13	4675.25	39101.1	6442.88	50379
4051.13	4734.22	39224.4	6351.71	50245.9
4061.14	4793.8	39348	6261.61	50112.6
4071.14	4854.04	39471.9	6172.51	49979
4081.14	4915.03	39596.2	6084.48	49845.2
4091.15	4976.66	39720.8	5997.38	49711.2
4101.15	5039.02	39845.8	5911.37	49576.9
4111.15	5102	39971	5826.3	49442.4
4121.15	5165.76	40096.6	5742.21	49307.8
4131.16	5230.14	40222.6	5659.16	49172.9
4141.16	5295.21	40348.8	5577.05	49037.8
4151.16	5361.09	40475.3	5495.98	48902.6
4161.16	5427.51	40602.1	5415.83	48767.2
4171.17	5494.82	40729.2	5336.63	48631.6
4181.17	5562.71	40856.6	5258.33	48495.8
4191.17	5631.31	40984.2	5181.06	48359.9
4201.18	5700.59	41112.1	5104.62	48223.8
4211.18	5770.67	41240.2	5029.24	48087.6
4221.18	5841.41	41368.6	4954.71	47951.2
4231.19	5912.94	41497.2	4881.13	47814.7
4241.19	5985.18	41626.1	4808.48	47677.9
4251.19	6058.13	41755.2	4736.68	47541.2
4261.19	6131.83	41884.5	4665.83	47404.3
4271.2	6206.22	42014	4595.86	47267.2
4281.2	6281.31	42143.7	4526.73	47130
4291.2	6357.24	42273.6	4458.41	46992.7
4301.2	6433.8	42403.7	4391.09	46855.4
4311.21	6511.2	42533.9	4324.58	46717.8
4321.21	6589.35	42664.2	4258.96	46580.2
4331.21	6668.14	42794.8	4194.12	46442.5
4341.22	6747.75	42925.5	4130.15	46304.7
4351.22	6828.15	43056.3	4067.02	46166.9
4361.22	6909.24	43187.2	4004.68	46028.9
4371.22	6991.06	43318.2	3943.18	45890.8
4381.23	7073.71	43449.4	3882.46	45752.7
4391.23	7157.1	43580.7	3822.58	45614.5
4401.23	7241.28	43712.1	3763.43	45476.2
4411.23	7326.21	43843.5	3705.18	45337.9
4421.24	7411.87	43974.9	3647.62	45199.5
4431.24	7498.37	44106.5	3590.82	45061
4441.24	7585.62	44238.1	3534.82	44922.5
4451.25	7673.65	44369.8	3479.57	44783.9
4461.25	7762.49	44501.5	3425.09	44645.3
4471.25	7852.09	44633.2	3371.3	44506.7
4481.26	7942.44	44764.9	3318.31	44367.9
4491.26	8033.59	44896.6	3266.02	44229.2
4501.26	8125.55	45028.4	3214.43	44090.4
4511.26	8218.32	45160.1	3163.54	43951.6
4521.27	8311.84	45291.7	3113.39	43812.8
4531.27	8406.25	45423.4	3063.94	43674
4541.27	8501.34	45555	3015.16	43535
4551.27	8597.33	45686.6	2967.02	43396.1
4561.28	8694.15	45818.1	2919.62	43257.2
4571.28	8791.71	45949.6	2872.88	43118.2
4581.28	8890.1	46080.9	2826.86	42979.3
4591.29	8989.28	46212.2	2781.38	42840.3
4601.29	9089.35	46343.3	2736.61	42701.3
4611.29	9190.21	46474.4	2692.45	42562.3
4621.29	9291.91	46605.3	2648.98	42423.4
4631.3	9394.43	46736.2	2606.06	42284.4
4641.3	9497.75	46866.9	2563.82	42145.4
4651.3	9601.9	46997.4	2522.17	42006.4
4661.31	9706.92	47127.8	2481.16	41867.4
4671.31	9812.77	47258.1	2440.69	41728.5
4681.31	9919.41	47388.2	2400.86	41589.5
4691.31	10027	47518.1	2361.55	41450.6
4701.32	10135.4	47647.8	2322.86	41311.7
4711.32	10244.6	47777.3	2284.74	41172.8
4721.32	10354.7	47906.6	2247.22	41033.9
4731.32	10465.7	48035.7	2210.22	40895
4741.33	10577.5	48164.6	2173.77	40756.3
4751.33	10690.1	48293.2	2137.85	40617.5
4761.33	10803.7	48421.6	2102.5	40478.7
4771.34	10918.1	48549.8	2067.66	40340
4781.34	11033.5	48677.8	2033.38	40201.3
4791.34	11149.5	48805.4	1999.63	40062.7
4801.34	11266.6	48932.8	1966.29	39924
4811.35	11384.5	49060	1933.59	39785.5
4821.35	11503.3	49186.8	1901.27	39647
4831.35	11623	49313.3	1869.51	39508.5
4841.35	11743.6	49439.6	1838.21	39370.1
4851.36	11865	49565.5	1807.45	39231.8
4861.36	11987.4	49691.1	1777.05	39093.4
4871.36	12110.7	49816.4	1747.2	38955.2
4881.37	12234.9	49941.4	1717.85	38817
4891.37	12360	50066	1688.88	38679
4901.37	12486	50190.2	1660.39	38540.9
4911.38	12612.8	50314.2	1632.38	38402.9
4921.38	12740.6	50437.7	1604.79	38265
4931.38	12869.4	50561	1577.57	38127.2
4941.38	12999.1	50683.8	1550.87	37989.4
4951.39	13129.6	50806.3	1524.57	37851.7
4961.39	13261.1	50928.3	1498.64	37714.1
4971.39	13393.6	51050.1	1473.18	37576.6
4981.4	13527	51171.3	1448.08	37439.2
4991.4	13661.3	51292.2	1423.38	37301.9
5001.4	13796.6	51412.7	1399.14	37164.7
5011.4	13932.8	51532.8	1375.23	37027.5
5021.41	14069.9	51652.4	1351.73	36890.5
5031.41	14208	51771.6	1328.6	36753.5
5041.41	14347.1	51890.4	1305.84	36616.7
5051.41	14487.1	52008.8	1283.48	36479.9
5061.42	14628	52126.7	1261.47	36343.3
5071.42	14769.9	52244.2	1239.79	36206.7
5081.42	14912.8	52361.1	1218.51	36070.4
5091.43	15056.6	52477.7	1197.53	35934.1
5101.43	15201.4	52593.8	1176.88	35798
5111.43	15347.2	52709.3	1156.68	35661.9
5121.43	15494	52824.5	1136.72	35526.1
5131.44	15641.6	52939.2	1117.11	35390.3
5141.44	15790.4	53053.3	1097.87	35254.6
5151.44	15940	53167.1	1078.92	35119.2
5161.44	16090.7	53280.3	1060.26	34983.8
5171.45	16242.3	53393	1041.92	34848.6
5181.45	16394.9	53505.2	1023.86	34713.5
5191.45	16548.5	53616.9	1006.2	34578.6
5201.46	16703.1	53728.1	988.774	34443.8
5211.46	16858.7	53838.8	971.695	34309.2
5221.46	17015.3	53948.9	954.84	34174.9
5231.47	17172.8	54058.6	938.275	34040.5
5241.47	17331.4	54167.8	922.031	33906.4
5251.47	17490.9	54276.4	906.063	33772.4
5261.47	17651.5	54384.4	890.297	33638.7
5271.48	17813	54492	874.854	33505.1
5281.48	17975.5	54599	859.683	33371.7
5291.48	18139	54705.5	844.756	33238.5
5301.48	18303.6	54811.4	830.13	33105.4
5311.49	18469	54916.8	815.712	32972.5
5321.49	18635.5	55021.7	801.582	32839.9
5331.49	18803.2	55126	787.631	32707.4
5341.5	18971.6	55229.7	774.006	32575.1
5351.5	19141.1	55332.9	760.604	32443.1
5361.5	19311.6	55435.5	747.414	32311.2
5371.5	19483.2	55537.6	734.428	32179.6
5381.51	19655.6	55639.1	721.711	32048.2
5391.51	19829.1	55740.1	709.211	31917
5401.51	20003.6	55840.5	696.952	31786
5411.52	20179.1	55940.3	684.874	31655.3
5421.52	20355.5	56039.5	673.041	31524.8
5431.52	20533	56138.2	661.372	31394.5
5441.52	20711.5	56236.3	649.997	31264.4
5451.53	20890.9	56333.8	638.766	31134.6
5461.53	21071.3	56430.8	627.741	31005.1
5471.53	21252.7	56527.2	616.877	30875.7
5481.53	21435.1	56623	606.219	30746.7
5491.54	21618.5	56718.2	595.854	30617.8
5501.54	21802.8	56812.8	585.608	30489.3
5511.54	21988	56906.9	575.542	30361
5521.55	22174.3	57000.3	565.693	30232.9
5531.55	22361.6	57093.3	555.992	30105.1
5541.55	22549.7	57185.5	546.444	29977.7
5551.55	22738.8	57277.3	537.097	29850.4
5561.56	22928.9	57368.4	527.958	29723.6
5571.56	23120	57459	518.948	29596.9
5581.56	23311.9	57548.9	510.146	29470.5
5591.56	23504.8	57638.3	501.514	29344.5
5601.57	23698.6	57727	492.945	29218.7
5611.57	23893.4	57815.2	484.581	29093.2
5621.57	24089.1	57902.8	476.417	28968
5631.58	24285.6	57989.8	468.393	28843.2
5641.58	24483.1	58076.2	460.544	28718.5
5651.58	24681.5	58162	452.786	28594.3
5661.59	24880.7	58247.3	445.22	28470.3
5671.59	25080.8	58331.9	437.739	28346.7
5681.59	25281.9	58416	430.414	28223.4
5691.59	25483.8	58499.4	423.275	28100.4
5701.6	25686.5	58582.3	416.206	27977.7
5711.6	25890.1	58664.5	409.329	27855.4
5721.6	26094.6	58746.2	402.6	27733.4
5731.6	26299.8	58827.3	395.965	27611.7
5741.61	26505.9	58907.8	389.429	27490.4
5751.61	26712.8	58987.6	383.057	27369.4
5761.61	26920.5	59066.9	376.839	27248.7
5771.62	27129.1	59145.6	370.663	27128.4
5781.62	27338.3	59223.8	364.641	27008.4
5791.62	27548.3	59301.3	358.732	26888.9
5801.62	27759.2	59378.2	352.955	26769.6
5811.63	27970.8	59454.6	347.283	26650.8
5821.63	28183.1	59530.3	341.723	26532.2
5831.63	28396.1	59605.4	336.284	26414
5841.64	28609.9	59680.1	330.895	26296.2
5851.64	28824.3	59754.1	325.693	26178.8
5861.64	29039.5	59827.5	320.582	26061.8
5871.64	29255.3	59900.3	315.517	25945.1
5881.65	29471.8	59972.5	310.61	25828.7
5891.65	29688.9	60044.1	305.706	25712.8
5901.65	29906.7	60115.2	300.969	25597.2
5911.65	30125.1	60185.6	296.376	25482
5921.66	30344.1	60255.6	291.773	25367.2
5931.66	30563.7	60324.8	287.355	25252.8
5941.66	30783.9	60393.6	282.937	25138.8
5951.67	31004.7	60461.7	278.689	25025.2
5961.67	31225.9	60529.3	274.516	24911.9
5971.67	31447.7	60596.3	270.412	24799
5981.68	31670.1	60662.7	266.388	24686.7
5991.68	31892.9	60728.4	262.446	24574.6
6001.68	32116.2	60793.7	258.563	24462.9
6011.68	32339.9	60858.4	254.768	24351.6
6021.69	32564.2	60922.5	251.016	24240.8
6031.69	32788.8	60986	247.422	24130.3
6041.69	33013.9	61048.9	243.869	24020.2
6051.69	33239.5	61111.3	240.429	23910.6
6061.7	33465.3	61173.2	236.937	23801.4
6071.7	33691.5	61234.4	233.573	23692.5
6081.7	33918.1	61295.1	230.314	23584.1
6091.71	34144.9	61355.2	227.077	23476.1
6101.71	34372	61414.7	223.944	23368.5
6111.71	34599.5	61473.8	220.93	23261.3
6121.71	34827.3	61532.2	217.836	23154.5
6131.72	35055.3	61590.1	214.899	23048.2
6141.72	35283.5	61647.3	212.015	22942.2
6151.72	35511.9	61704.1	209.175	22836.7
6161.73	35740.5	61760.4	206.391	22731.6
6171.73	35969.3	61816	203.675	22626.9
6181.73	36198.1	61871.1	201.001	22522.6
6191.73	36427.2	61925.7	198.413	22418.8
6201.74	36656.3	61979.6	195.854	22315.3
6211.74	36885.5	62033.1	193.335	22212.3
6221.74	37114.8	62086	190.898	22109.6
6231.74	37344.1	62138.4	188.488	22007.4
6241.75	37573.4	62190.2	186.14	21905.7
6251.75	37802.8	62241.5	183.843	21804.3
6261.75	38032.1	62292.2	181.595	21703.4
6271.76	38261.3	62342.4	179.373	21602.9
6281.76	38490.5	62392.1	177.23	21502.8
6291.76	38719.6	62441.3	175.096	21403.2
6301.77	38948.6	62489.9	173.035	21303.9
6311.77	39177.5	62538	170.979	21205.1
6321.77	39406.1	62585.5	169.014	21106.7
6331.77	39634.6	62632.6	167.091	21008.7
6341.78	39862.9	62679.1	165.117	20911.1
6351.78	40091	62725.1	163.301	20813.9
6361.78	40318.8	62770.6	161.454	20717.2
6371.78	40546.4	62815.6	159.671	20620.9
6381.79	40773.7	62860	157.924	20525
6391.79	41000.6	62904	156.214	20429.5
6401.79	41227.2	62947.4	154.529	20334.5
6411.8	41453.5	62990.3	152.867	20239.8
6421.8	41679.3	63032.7	151.256	20145.6
6431.8	41904.8	63074.6	149.682	20051.8
6441.8	42129.9	63116.1	148.092	19958.4
6451.81	42354.4	63157	146.582	19865.4
6461.81	42578.5	63197.4	145.107	19772.8
6471.81	42802.1	63237.4	143.643	19680.6
6481.81	43025.1	63276.8	142.217	19588.9
6491.82	43247.7	63315.8	140.807	19497.5
6501.82	43469.7	63354.3	139.4	19406.6
6511.82	43691	63392.3	138.086	19316.1
6521.83	43911.8	63429.8	136.753	19226
6531.83	44131.9	63466.8	135.471	19136.3
6541.83	44351.4	63503.4	134.185	19046.9
6551.83	44570.2	63539.5	132.928	18958
6561.84	44788.3	63575.1	131.737	18869.5
6571.84	45005.7	63610.3	130.525	18781.4
6581.84	45222.3	63645	129.345	18693.7
6591.85	45438.1	63679.3	128.209	18606.5
6601.85	45653.3	63713	127.061	18519.5
6611.85	45867.6	63746.3	125.981	18432.9
6621.85	46081	63779.2	124.886	18346.8
6631.86	46293.6	63811.7	123.824	18261.1
6641.86	46505.3	63843.7	122.775	18175.8
6651.86	46716.2	63875.2	121.727	18090.8
6661.86	46926.1	63906.3	120.728	18006.3
6671.87	47135.1	63937	119.73	17922.1
6681.87	47343.1	63967.2	118.759	17838.3
6691.87	47550.2	63997	117.803	17754.9
6701.88	47756.2	64026.4	116.874	17671.9
6711.88	47961.3	64055.4	115.951	17589.2
6721.88	48165.3	64083.9	115.035	17507
6731.89	48368.3	64112.1	114.145	17425.1
6741.89	48570.2	64139.8	113.306	17343.6
6751.89	48771.1	64167.1	112.384	17262.5
6761.89	48970.8	64194	111.6	17181.7
6771.9	49169.3	64220.4	110.741	17101.4
6781.9	49366.8	64246.5	109.92	17021.4
6791.9	49563	64272.2	109.141	16941.7
6801.9	49758.2	64297.5	108.3	16862.5
6811.91	49952.1	64322.4	107.591	16783.5
6821.91	50144.7	64347	106.771	16705
6831.91	50336.3	64371.1	106.011	16626.9
6841.92	50526.5	64394.8	105.354	16549
6851.92	50715.4	64418.2	104.547	16471.6
6861.92	50903.2	64441.2	103.81	16394.5
6871.92	51089.6	64463.8	103.199	16317.8
6881.93	51274.7	64486.1	102.456	16241.4
6891.93	51458.5	64508	101.738	16165.3
6901.93	51640.9	64529.5	101.094	16089.6
6911.94	51822	64550.7	100.533	16014.3
6921.94	52001.7	64571.5	99.819	15939.3
6931.94	52180.2	64592	99.103	15864.7
6941.94	52357.1	64612.1	98.445	15790.4
6951.95	52532.7	64632	97.816	15716.5
6961.95	52706.9	64651.4	97.249	15642.9
6971.95	52879.7	64670.5	96.735	15569.6
6981.95	53050.9	64689.4	96.094	15496.7
6991.96	53220.8	64707.8	95.489	15424.1
7001.96	53389.2	64726	94.89	15351.9
7011.96	53556.1	64743.8	94.281	15280
7021.97	53721.6	64761.3	93.697	15208.4
7031.97	53885.5	64778.5	93.133	15137.1
7041.97	54048	64795.4	92.569	15066.2
7051.98	54209	64811.9	92.038	14995.6
7061.98	54368.5	64828.2	91.564	14925.3
7071.98	54526.4	64844.1	91.047	14855.4
7081.98	54682.7	64859.8	90.476	14785.8
7091.99	54837.6	64875.2	89.975	14716.4
7101.99	54990.8	64890.4	89.459	14647.5
7111.99	55142.6	64905.1	88.89	14578.9
7121.99	55292.8	64919.6	88.476	14510.5
7132	55441.4	64933.9	88.029	14442.4
7142	55588.4	64947.9	87.402	14374.8
7152	55734	64961.6	86.955	14307.4
7162.01	55877.8	64975	86.56	14240.3
7172.01	56020.1	64988.2	86.023	14173.6
7182.01	56160.7	65001.1	85.562	14107.1
7192.01	56299.8	65013.8	85.14	14041
7202.02	56437.3	65026.2	84.637	13975.2
7212.02	56573.2	65038.3	84.25	13909.7
7222.02	56707.4	65050.2	83.757	13844.4
7232.02	56840.1	65061.9	83.303	13779.5
7242.03	56971.1	65073.4	82.931	13714.9
7252.03	57100.5	65084.6	82.441	13650.6
7262.03	57228.3	65095.5	82.023	13586.6
7272.04	57354.5	65106.3	81.646	13522.9
7282.04	57479	65116.8	81.164	13459.4
7292.04	57601.9	65127.1	80.811	13396.3
7302.04	57723.3	65137.1	80.407	13333.5
7312.05	57842.9	65147	79.95	13271
7322.05	57961	65156.6	79.63	13208.8
7332.05	58077.4	65166	79.17	13146.8
7342.06	58192.1	65175.3	78.797	13085.2
7352.06	58305.3	65184.3	78.462	13023.8
7362.06	58416.8	65193.1	77.997	12962.7
7372.06	58526.8	65201.7	77.667	12902
7382.07	58635.1	65210.2	77.319	12841.5
7392.07	58741.7	65218.4	76.877	12781.4
7402.07	58846.8	65226.5	76.591	12721.4
7412.07	58950.3	65234.3	76.209	12661.8
7422.08	59052.1	65242	75.815	12602.4
7432.08	59152.4	65249.5	75.523	12543.4
7442.08	59251	65256.9	75.113	12484.6
7452.09	59348	65264.1	74.777	12426.2
7462.09	59443.5	65271	74.503	12367.9
7472.09	59537.3	65277.9	74.084	12310
7482.1	59629.5	65284.5	73.77	12252.4
7492.1	59720.2	65291.1	73.493	12195
7502.1	59809.2	65297.4	73.091	12137.9
7512.1	59896.8	65303.6	72.77	12081.1
7522.11	59982.7	65309.7	72.556	12024.6
7532.11	60067.1	65315.5	72.143	11968.3
7542.11	60149.8	65321.3	71.812	11912.3
7552.11	60231.2	65326.9	71.607	11856.6
7562.12	60310.8	65332.4	71.248	11801.2
7572.12	60389	65337.7	70.897	11746
7582.12	60465.6	65342.9	70.684	11691.2
7592.13	60540.7	65348	70.403	11636.6
7602.13	60614.2	65352.9	70.004	11582.3
7612.13	60686.3	65357.7	69.766	11528.2
7622.13	60756.8	65362.4	69.561	11474.4
7632.14	60825.9	65366.9	69.185	11420.8
7642.14	60893.4	65371.4	68.893	11367.6
7652.14	60959.4	65375.7	68.691	11314.6
7662.15	61024	65379.9	68.44	11261.9
7672.15	61087.1	65384	68.069	11209.5
7682.15	61148.7	65388	67.834	11157.3
7692.15	61208.9	65391.9	67.656	11105.4
7702.16	61267.6	65395.6	67.402	11053.8
7712.16	61324.8	65399.3	67.039	11002.5
7722.16	61380.7	65402.9	66.82	10951.3
7732.16	61435	65406.3	66.639	10900.5
7742.17	61488	65409.7	66.417	10849.9
7752.17	61539.6	65412.9	66.067	10799.6
7762.17	61589.8	65416.1	65.823	10749.5
7772.18	61638.5	65419.2	65.68	10699.8
7782.18	61685.9	65422.2	65.521	10650.3
7792.18	61731.8	65425.1	65.205	10601
7802.19	61776.5	65427.9	64.914	10552
7812.19	61819.7	65430.7	64.735	10503.3
7822.19	61861.7	65433.3	64.599	10454.9
7832.19	61902.2	65435.9	64.423	10406.6
7842.2	61941.4	65438.4	64.099	10358.7
7852.2	61979.3	65440.9	63.854	10311.1
7862.2	62015.9	65443.2	63.687	10263.6
7872.2	62051.1	65445.4	63.555	10216.5
7882.21	62085	65447.7	63.403	10169.6
7892.21	62117.7	65449.8	63.14	10123
7902.21	62149.1	65451.9	62.899	10076.7
7912.22	62179.1	65453.9	62.727	10030.6
7922.22	62207.9	65455.8	62.595	9984.77
7932.22	62235.5	65457.7	62.468	9939.15
7942.22	62261.7	65459.5	62.28	9893.83
7952.23	62286.8	65461.3	62.016	9848.81
7962.23	62310.5	65463	61.857	9803.97
7972.23	62333.1	65464.6	61.717	9759.4
7982.23	62354.5	65466.2	61.601	9715.13
7992.24	62374.6	65467.7	61.487	9671.1
8002.24	62393.5	65469.2	61.329	9627.33
8012.24	62411.2	65470.7	61.062	9583.79
8022.25	62427.7	65472.1	60.912	9540.58
8032.25	62443	65473.4	60.777	9497.56
8042.25	62457.2	65474.7	60.662	9454.8
8052.25	62470.3	65475.9	60.582	9412.4
8062.26	62482	65477.1	60.487	9370.11
8072.26	62492.7	65478.3	60.326	9328.11
8082.26	62502.2	65479.4	60.108	9286.41
8092.27	62510.6	65480.4	59.98	9244.96
8102.27	62517.8	65481.5	59.849	9203.73
8112.27	62523.9	65482.5	59.78	9162.8
8122.27	62528.9	65483.4	59.699	9122.13
8132.28	62532.8	65484.4	59.646	9081.67
8142.28	62535.6	65485.2	59.574	9041.45
8152.28	62537.3	65486	59.376	9001.53
8162.29	62537.8	65486.8	59.215	8961.84
8172.29	62537.3	65487.6	59.108	8922.35
8182.29	62535.8	65488.4	59.029	8883.13
8192.29	62533	65489.1	58.959	8844.19
8202.3	62529.3	65489.7	58.904	8805.55
8212.3	62524.4	65490.4	58.847	8767.13
8222.3	62518.6	65491	58.788	8728.93
8232.31	62511.6	65491.6	58.756	8690.96
8242.31	62503.6	65492.2	58.599	8653.22
8252.31	62494.5	65492.7	58.468	8615.81
8262.31	62484.5	65493.2	58.405	8578.59
8272.32	62473.3	65493.7	58.353	8541.65
8282.32	62461.2	65494.2	58.28	8504.93
8292.32	62448	65494.7	58.241	8468.42
8302.32	62433.9	65495.1	58.219	8432.21
8312.33	62418.6	65495.5	58.203	8396.25
8322.33	62402.3	65495.9	58.189	8360.56
8332.33	62385.1	65496.2	58.185	8325.06
8342.34	62366.8	65496.6	58.146	8289.82
8352.34	62347.6	65496.9	58.013	8254.8
8362.34	62327.3	65497.1	57.933	8220
8372.34	62306	65497.5	57.906	8185.5
8382.35	62283.7	65497.7	57.863	8151.24
8392.35	62260.4	65498	57.861	8117.18
8402.35	62236.1	65498.2	57.857	8083.37
8412.35	62210.9	65498.5	57.852	8049.76
8422.36	62184.7	65498.7	57.86	8016.41
8432.36	62157.4	65498.8	57.868	7983.29
8442.36	62129.2	65499	57.882	7950.44
8452.37	62100.1	65499.2	57.896	7917.8
8462.37	62069.8	65499.3	57.909	7885.38
8472.37	62038.7	65499.5	57.922	7853.18
8482.38	62006.6	65499.6	57.855	7821.27
8492.38	61973.5	65499.7	57.819	7789.53
8502.38	61939.4	65499.8	57.817	7758.04
8512.38	61904.3	65499.9	57.834	7726.77
8522.39	61868.3	65500	57.864	7695.72
8532.39	61831.3	65500	57.874	7664.92
8542.39	61793.3	65500.1	57.911	7634.35
8552.4	61754.3	65500.1	57.944	7603.98
8562.4	61714.4	65500.1	57.965	7573.85
8572.4	61673.4	65500.1	58.011	7543.88
8582.4	61631.6	65500.2	58.054	7514.19
8592.41	61588.7	65500.1	58.096	7484.71
8602.41	61544.9	65500.2	58.131	7455.49
8612.41	61500.1	65500.1	58.182	7426.42
8622.41	61454.3	65500.1	58.238	7397.54
8632.42	61407.5	65500.1	58.298	7368.92
8642.42	61359.7	65500	58.343	7340.53
8652.42	61310.9	65500	58.395	7312.33
8662.43	61261.3	65499.9	58.467	7284.32
8672.43	61210.6	65499.9	58.53	7256.54
8682.43	61158.9	65499.8	58.6	7229.03
8692.43	61106.2	65499.7	58.659	7201.66
8702.44	61052.6	65499.6	58.725	7174.43
8712.44	60997.8	65499.5	58.801	7147.46
8722.44	60942.2	65499.4	58.878	7120.69
8732.44	60885.6	65499.3	58.966	7094.17
8742.45	60827.9	65499.2	59.03	7067.82
8752.45	60769.3	65499	59.131	7041.62
8762.45	60709.7	65498.9	59.196	7015.61
8772.46	60649	65498.7	59.286	6989.82

## Sheet: Fig. 2G
Fig. 2G	ROI(F+T)					ROI(F)					ROI(T)					ROI(F)+ROI(T)
Time (hrs)	1	2	3	4	5	1	2	3	4	5	1	2	3	4	5	1	2	3	4	5
0	20.2901	40.5579	22.3931	38.4715	20.4678	13.7009	17.245	12.1265	18.5416	14.5427	22.9414	23.7254	15.0505	22.2058	11.0276	36.6423	40.9704	27.1771	40.7474	25.5703
0.63	35.6817	63.8531	41.3473	62.5015	39.9717	21.6476	29.3523	20.1766	36.8753	23.8988	31.6327	35.6075	24.1841	36.0579	20.9655	53.2803	64.9598	44.3606	72.9332	44.8643
1.26	49.6963	84.078	59.5657	83.6019	60.1945	29.7256	43.0364	29.4119	60.756	33.7871	38.1546	44.5783	32.2132	50.3797	32.2713	67.8802	87.6147	61.6251	111.136	66.0584
1.89	61.8752	101.348	74.972	103.168	77.8358	38.1528	52.8615	37.7389	80.2467	42.3903	44.8352	54.5706	40.0318	62.2977	42.9301	82.988	107.432	77.7707	142.544	85.3204
2.52	72.2001	112.868	88.0349	118.028	91.8411	46.2079	60.5818	45.42	91.8319	49.3733	50.4233	61.2961	46.802	70.5917	51.8357	96.6313	121.878	92.222	162.424	101.209
3.15	81.478	121.645	99.3921	131.132	103.013	54.0442	66.9093	52.3432	99.655	55.5189	55.0303	67.1375	53.0284	78.144	59.5905	109.074	134.047	105.372	177.799	115.109
3.78	89.3906	129.75	109.022	143.345	111.175	61.0191	73.4126	58.6159	107.379	60.38	59.6095	71.9003	58.7864	85.1522	66.3497	120.629	145.313	117.402	192.532	126.73
4.41	95.6935	138.19	117.496	151.431	117.034	67.4232	80.0906	64.5289	112.165	62.3735	63.3968	76.4207	64.1086	91.1025	72.7609	130.82	156.511	128.638	203.268	135.134
5.04	101.721	146.031	122.263	160.011	123.571	72.8839	86.6066	67.42	115.075	67.1182	67.1855	79.9703	67.9539	96.5111	78.7341	140.069	166.577	135.374	211.586	145.852
5.67	106.924	151.657	126.108	169.1	131.694	78.4928	89.2246	68.8951	120.37	74.1916	70.3522	84.3054	71.9686	102.023	83.4794	148.845	173.53	140.864	222.393	157.671
6.3	110.912	155.062	127.593	177.529	138.366	82.9502	90.1329	69.8586	124.747	80.4024	73.5864	88.0682	75.7545	106.816	88.5985	156.537	178.201	145.613	231.563	169.001
6.93	114.883	162.133	130.433	185.516	138.967	87.0573	96.0368	71.6026	131.323	76.7027	75.8324	91.099	79.219	110.899	94.4704	162.89	187.136	150.822	242.222	171.173
7.56	118.734	166.459	137.78	193.431	140.627	90.8622	99.5423	78.6006	136.27	78.4199	78.0998	93.1407	82.9045	115.209	98.1969	168.962	192.683	161.505	251.479	176.617
8.19	121.375	171.224	142.804	200.84	146.731	94.3762	102.853	83.8453	140.724	86.868	79.9032	95.4016	86.0182	119.37	100.176	174.279	198.255	169.864	260.094	187.044
8.82	123.971	174.214	144.28	204.46	152.141	97.5856	106.681	84.7541	140.369	91.6405	82.2817	95.9628	89.0824	123.262	104.635	179.867	202.644	173.836	263.631	196.276
9.45	126.552	174.888	144.271	203.441	149.727	100.481	109.076	83.4695	134.271	87.4668	84.4901	95.3595	92.7551	127.795	107.578	184.972	204.435	176.225	262.066	195.045
10.08	128.581	169.769	143.45	207.774	150.458	102.962	103.547	81.9704	137.978	87.9686	85.7518	98.2753	94.721	130.801	110.158	188.714	201.823	176.691	268.779	198.127
10.71	130.143	177.667	141.911	218.586	151.758	105.207	109.266	81.7169	149.872	89.0575	86.8524	99.7814	96.6802	130.973	112.211	192.059	209.048	178.397	280.845	201.269
11.34	131.952	179.812	143.485	221.507	153.372	107.18	110.824	83.7216	152.919	91.0916	88.2925	100.777	98.516	130.918	113.925	195.473	211.601	182.238	283.837	205.017
11.97	132.766	181.018	144.281	222.901	154.317	108.833	112.084	84.5503	151.293	93.1835	89.2906	101.526	100.604	134.801	115.623	198.124	213.61	185.154	286.094	208.807
12.6	133.931	182.499	145.746	224.053	156.476	109.995	113.625	86.0504	149.804	95.3709	90.2245	102.466	102.583	137.798	117.575	200.219	216.091	188.633	287.603	212.946
13.23	134.549	183.839	146.921	228.876	157.045	111.562	114.913	87.512	155.066	97.251	91.4448	103.215	104.547	137.974	119.023	203.007	218.128	192.059	293.04	216.274
13.86	135.548	185.629	147.42	230.932	158.075	112.912	116.427	88.0057	156.953	99.0729	91.9653	104.156	105.94	139.642	120.6	204.878	220.583	193.946	296.594	219.672
14.49	135.739	187.279	147.22	233.438	158.875	113.789	118.086	88.316	158.655	100.501	92.3462	104.664	107.33	140.462	121.33	206.135	222.75	195.646	299.117	221.831
15.12	136.263	186.931	147.956	234.718	158.818	115.237	117.983	89.2735	159.808	100.519	93.0883	105.466	109.368	142.255	122.477	208.325	223.45	198.642	302.063	222.996

## Sheet: Fig. 2H
Fig. 2H	ROI(F+T)	ROI(F)+ROI(T)
	1.08092	1.29208
	0.787935	1.20463
	0.855549	1.14863
	1.35724	1.74666
	0.918354	1.28946

## Sheet: Fig. 3E
Fig. 3E	R1				R1+2
	1	2	3	4	1	2	3	4
R1c	22810.3	23609.4	28203.8	23727.2	19307.2	28165.7	28306.3	28476.8
R1e	8984.31	10390.7	12856	12684.5	7993.06	11168.5	12011.2	13002.3
R1i	3287.55	4229.3	4156.44	4640.76	6416.8	10298.4	8897.39	8523.61
R2c	3680.86	3793.84	4028.6	4084.49	19381.2	26617.9	31252.1	28465
R2e	3652.64	3939.18	4122.46	5403.47	7789.59	11178.3	12472.3	12884.4
R2i	7496.99	9047.11	10874.3	7749.6	6489.52	9542.4	9499.44	9026.44
R3c	3299.57	4041.8	3775.76	4778.35	3629.32	4535.12	3937.85	4844.04
R3e	3769.35	4754.85	5100.48	5108.4	4466.71	6107.02	5872.11	7113.15
R3i	7751.89	8124.46	9954.93	8205.56	10327	14165.7	15231.3	15661
R1(i) + R2(i)					12906.3	19840.8	18396.8	17550.1
(m)	3913.39	5359.63	5573.4	6617.64	4752.06	6710.61	7535.59	8173.1

## Sheet: Fig. 4E
Fig. 4E
Caspase3/7/NucBlue	1	2	3	4	5	6	7	8
R1c	0.269611	0.30488	0.205375	0.551106	0.675633	0.707147	0.992838	1.20619
R1e	0.438074	0.327033	0.31307	0.173952	0.484508	0.457815	0.588662	0.804643
R1i	0.299281	0.345975	0.349091	0.272044	0.220051	0.340844	0.697374	0.411683
R2c	0.204748	0.258141	0.313489	0.736292	0.738819	0.617271	1.01591	1.26816
R2e	0.385704	0.438933	0.311815	0.454244	0.474167	0.514418	0.790143	0.760474
R2i	0.458978	0.416131	0.331318	0.111605	0.141306	0.403168	0.406926	0.838845
R3c	0.189409	0.271592	0.251243	0.739298	0.650798	0.576447	1.03639	1.33962
R3e	0.395915	0.380406	0.329632	0.309596	0.30257	0.413095	0.769863	0.904914
R3i	0.311658	0.311015	0.268942	0.149497	0.149733	0.25216	0.540935	0.589497
R1+2+3m	0.421236	0.336159	0.241861	0.0745449	0.0658197	0.115332	0.463758	0.37398

## Sheet: Fig.4F
Fig. 4F
PI/NucBlue	1	2	3	4	5	6	7	8
R1c	0.543099	0.576693	0.453525	0.534902	0.507637	0.608413	0.773745	0.737486
R1e	0.342105	0.234125	0.276468	0.0699969	0.169835	0.128583	0.179365	0.19005
R1i	0.251699	0.283569	0.219541	0.0857323	0.0954195	0.10238	0.288382	0.0971664
R2c	0.419385	0.485788	0.579746	0.559928	0.593195	0.495075	0.82605	0.758026
R2e	0.285058	0.357158	0.244654	0.153605	0.16708	0.157581	0.208299	0.190348
R2i	0.264931	0.307573	0.242636	0.0197585	0.0588934	0.123319	0.154	0.220801
R3c	0.360342	0.552963	0.487314	0.671296	0.648224	0.48055	0.845194	0.738398
R3e	0.239515	0.289923	0.205879	0.0942506	0.0922946	0.11673	0.257289	0.203642
R3i	0.257637	0.229532	0.218769	0.0517375	0.035781	0.0879611	0.191246	0.184481
R1+2+3m	0.192937	0.150701	0.139175	0.0274109	0.0229385	0.00109842	0.111685	0.0860303

## Sheet: Fig. 5C D E
Fig. 5C-E
	R1(c)
Fig. 5C	Nav only	Gem only	Nav+Gem	Nav only + Gem only ((N)+(G))
	2.48815	0.341379	3.21287	1.98012
	0.867835	0.847879	1.73043	0.979895
	1.01582	0.394669	2.12313	1.00958
	1.30224	0.0485802	1.65515	1.28756
	m
Fig. 5D	Nav only	Gem only	Nav+Gem	Nav only + Gem only ((N)+(G))
	-0.0714758	0.424455	0.873639	0.383317
	1.53147	1.83392	0.346037	0.556796
	-0.0680885	0.503147	0.423701	0.469317
	0.209548	0.582388	1.452	0.669898
	R2(c)
Fig. 5E	Nav only	Gem only	Nav+Gem	Nav only + Gem only ((N)+(G))
	0.266936	0.0661596	0.693682	0.315435
	1.84086	1.05169	0.321282	0.956539
	0.0279029	0.231404	0.360589	0.25285
	0.077481	0.433596	0.13447	0.477482

## Sheet: Fig. 5F G
Fig. 5F
R2(i)	R3(i)	R1(i)	EBlissR2(i)+R1(i)
1.13048	0.548639	0.772883	1.02963
0.324028	0.480722	0.297169	0.524906
0.431254	1.00036	0.504342	0.718097
0.84316	0.526211	0.639912	0.943524
Fig. 5G
R1(c)	(m)	R2(c)	R3(i)
0.61631	0.438759	0.454726	1.3322
0.566274	1.60906	2.97726	1.76635
0.475513	1.10766	0.701213	1.42383
0.777908	0.461363	3.55085	1.47446

## Sheet: SFig. 1B
SFig. 1B
DOX in R1
Timepoints	R1c				R3i				R2c				R1i				R3c				R2i				R1e				R2e				R3e				R1+2+3m
1	22810.3	20784.3	26528	23057.5	7751.89	7959.56	9128.54	7127.13	3419.87	3270.04	3695.06	2701.56	3203.57	3720.92	3855.23	3194.55	3176.11	3311.39	3460.18	3095.13	7496.99	7987.07	10756.7	6447.48	8984.31	9046.18	11441.4	10741.6	3414.03	3146.94	3262.57	3576.73	3676.7	3781.53	4018.79	3246.9	3735.57	3709.77	3872.11	3795.87
2	20427.1	23609.3	28203.8	23727.2	7340.76	8124.46	9954.93	8067.02	3454.17	3585.44	3804.84	3055.14	3263.31	4032.31	3890.83	3458.83	3194.91	3624.5	3572.91	3467.21	7157.98	9047.11	10874.3	7273.27	8430.69	10390.7	12856	12501.2	3509.23	3564.12	3467.2	4145.51	3769.35	4263.99	4267.1	3777.66	3913.39	4481.04	4778.04	4504.86
3	16651	20863.7	25398.8	22654.9	6417.31	7645.43	9655.07	8205.56	3186.32	3372.25	3804.11	3350.02	3000.15	3973.26	3830.19	3870.22	3019.41	3646.11	3506.93	3936.45	6040.61	8523.49	10138.7	7749.6	7143.66	9925.18	12330.2	12684.5	3309.31	3551.61	3686.01	4685.7	3425.28	4325.33	4545.08	4376.94	3611.53	4720.29	5419.8	5416.65
4	15225.1	20367.8	21929.8	19759.2	6180.02	7911.95	8818.08	7617.24	3323.32	3793.84	3672.35	3432.52	3018.31	4208.71	3725.74	3978	3020.06	3866.7	3405.55	4066.87	5822.57	8722.89	9113.05	7481.65	6697.43	10272.3	11131.9	11677.9	3380.4	3939.18	3778.54	4780.4	3446.87	4754.85	4561.87	4531.67	3672.58	5359.63	5522.39	5798.25
5	14457.9	17392.4	19691.5	16780.1	6208.11	7127.98	8187.92	6865.33	3571.71	3665.76	3647.23	3322.59	3253.81	4175.87	3789.81	3833.43	3283.19	3903.14	3418.12	3818.53	5749.69	7993.94	8464.91	6642.49	6598.67	9210.11	10188.4	10151.3	3568.08	3918.62	3772.98	4660.89	3716.25	4732.27	4746.97	4335.77	3884.04	5290.52	5475.38	5751.85
6	12984.3	15046.5	17135.2	16106.8	5916.26	6445.49	7434.73	6904.07	3625.8	3495.62	3625.56	3651.69	3268.08	4058.86	3732.27	4156.08	3299.57	3741.82	3338.91	4243.18	5461.37	7186.8	7710.33	6896.08	6149.15	8126.92	9107.03	10138.9	3630.58	3747.28	3761.38	5084.1	3716.37	4550.24	4586.59	4782.21	3859.65	5051.44	5375.87	6417.89
7	10875.9	13062.8	16160.1	12611.8	5297.52	5809.53	7161.97	5757.75	3360.86	3475.89	3746.06	3317.55	3057.74	3914.7	3953.98	3834.34	3092.41	3739.59	3533.84	3851.66	4910.41	6664.31	7588.65	5709.62	5374.58	7353.11	8768.62	8206.96	3375.88	3652.26	3888.22	4607.21	3486.54	4480.32	4814.22	4263.46	3572.45	4846.54	5435.49	5763.6
8	10394.5	12763.9	15423.3	12743.5	5331.95	5952.69	7120.31	6077.69	3610.79	3744.94	3981.02	3733.83	3267.66	4151.33	4079.13	4282.96	3247.85	3907.06	3687.15	4371.38	5122.6	6811.04	7534.69	6195.57	5363.74	7381	8583.58	8573.01	3610.72	3929.8	4122.46	5100.56	3751.22	4708.24	5100.48	4823.13	3775.75	5070.55	5573.4	6410.05
9	9183.49	10590	13985.6	11348.1	5186.9	5205.61	6686.09	5749.09	3605.76	3479.86	4028.6	3703.89	3224.03	3835.28	4148.57	4311.97	3249.97	3655.62	3753.87	4321.33	4813.37	5853.36	7153.16	5945.57	5035.87	6343.95	7923.27	7988.45	3624.4	3636.56	4068.3	5114.19	3656.26	4289.16	5057.42	4844.59	3673.32	4716.07	5408.33	6367.38
10	8190.38	10372.3	12490.8	10392.8	4857.82	5351.24	6255.17	5620.87	3507.87	3686.15	3928.11	3834.19	3199.77	4202.13	4156.44	4306.39	3229.3	3899.58	3756.07	4470.62	4546.95	6115.06	6637.33	5763.02	4632.18	6437.22	7273.78	7643.7	3534.18	3849.58	4009.95	5192.39	3632.32	4681.65	4930.42	4903.79	3591.82	4905.54	5255.59	6386.82
11	7364.48	9562.82	11051.8	9364.6	4708.04	5190.2	5843.21	5368.59	3470.38	3755.9	3849.11	3819.6	3171.57	4229.3	3985.06	4368.79	3203.72	4041.8	3586.33	4455.28	4365.87	5883.58	6184.04	5553.38	4301.26	6059.48	6608.65	7177.42	3444.46	3839.41	3848.88	5169.15	3497.07	4626.2	4702.88	4907.79	3471.7	4893.47	4926.66	6360.42
12	6765.9	7986.8	10263.1	9016.16	4576.44	4802.56	5717.02	5525.67	3431.03	3470.13	3971.51	4084.49	3076.37	3851.81	4154.45	4640.76	3106.42	3654.8	3721.84	4778.35	4183.64	5157.07	6106.18	5701.98	4122.69	5311.22	6416.57	7170.66	3488.35	3497.72	3872.52	5403.47	3413.05	4228.75	4865.71	5108.4	3379.94	4393.72	5018.39	6617.64
13	6541.32	7526.58	9397.16	8427.81	4669.69	4762.91	5463.26	5424.89	3602.59	3630.32	3957.16	4027.68	3252.39	4030.01	4064.72	4484.26	3258.07	3844.68	3735.39	4638.5	4324.4	5155.24	5899.28	5446.81	4167.32	5184.22	6057.07	7020.06	3604.14	3649.49	3863.61	5391.75	3619.88	4359.78	4782.45	4978.29	3506.15	4520.06	4877.85	6538.46
14	6115.46	6723.19	8547.12	6969.33	4593.29	4449.28	5275.8	4732.65	3680.86	3517.45	4013.9	3685.83	3287.55	3871.32	4128.3	4110.78	3214.53	3649.29	3775.76	4235.06	4270.66	4901.02	5618.67	4816.83	4020.41	4842.81	5748.53	5866.69	3652.64	3495.97	3871.56	4810.99	3675.26	4103.49	4751.13	4491.28	3501.12	4264.67	4808.46	5750.65
DOX in R1+R2
Timepoints	R1c				R3i				R2c				R1i				R3c				R2i				R1e				R2e				R3e				R1+2+3m
1	19307.2	26970.4	28306.3	28476.8	10327	12448.4	13842	12841	19381.2	25141.6	31252	28465	6404.82	9961.62	8864.39	7995.12	3253.69	3658.76	3457.01	3108.29	6441.07	9072.94	9499.44	8041.71	7993.06	9797.87	10094.6	10899.7	7789.59	9778.86	11431.8	11270.4	4024.03	4131.81	4036.35	4076.75	4416.5	3834.67	4482.7	3945.2
2	17990.7	28165.7	27570.7	26755	10123.3	14165.7	15231.3	14328.8	18108.2	26617.9	29522.5	26116.1	6416.8	10298.4	8897.39	7745.35	3430.97	3858.03	3489.25	3185.31	6489.52	9542.4	9384.86	8130.67	7795.63	11168.5	12011.2	11711.5	7697.07	11161.9	12472.3	11923.5	4350.24	4852.66	4512.86	4669.2	4650.86	5299.1	6361.01	5043.69
3	14746.9	25675.7	24538.3	27081.1	8655.58	13723	14718.4	15661	15080.5	24025.9	25896.6	26406.6	5805.87	10045	8736.19	8523.61	3337.07	4028.84	3552.82	3765.04	5848.5	9234.86	9124.63	9026.44	6663.84	11067.2	11826.6	13002.3	6810.48	11178.3	11932.9	12884.4	4273.85	5239.31	4803.04	5904.46	4385.62	6304.11	7288.15	6681.63
4	12851	22999.1	21038	24313.1	7862.53	13012.9	12995.9	14459.6	13270.8	21324.5	22000	23390.7	5465.8	9266.62	7931.83	8432.79	3341.51	3994.39	3445.34	4018.54	5509.4	8839.52	8239.09	8788.96	6217.89	10460.4	10708.2	12448.5	6339.37	10626.4	10510.1	12347.1	4206.65	5543.67	4990.98	6494.55	4397.84	6553.6	7095.84	7468.22
5	12089.8	21094	18979.3	19671.7	7601.94	12140.5	11847.1	11984.3	12389.6	19357.3	19668.8	18798.5	5568.98	9086.18	7550.7	7501.73	3492.27	4305.44	3444.93	3823.17	5636.91	8717.08	7872.23	7784.05	6183.4	10106.1	10078.8	10707.1	6337.38	10232.9	9802.8	10591.3	4457.92	5992.21	5186.34	6112.01	4569.79	6710.61	7226.71	7215.92
6	10510.6	17381.1	16851.3	19335.8	7053.75	10400.3	10647.8	12184.3	11001.9	16078.5	17524.7	18258	5317.98	7908.19	7132.28	7829.77	3477.11	4127.59	3458.37	4105.48	5350.5	7670.94	7335.26	8175.08	5826.52	8675.03	9329.11	11074.9	5877.7	8889.96	9058.64	10832.4	4376.48	5687.68	5249.96	6769.67	4559.03	6249.72	7248.03	8118.71
7	9216.33	16198.8	15829.8	15246.1	6327.74	9764.04	10210.6	9815.82	9631.39	14642	16269.9	14266.5	5126.41	7636.8	7130.44	6874.02	3507.35	4367.87	3715.6	3845.82	5230.49	7662.16	7541.58	7064.66	5444.03	8391.6	9117.63	9156.9	5633.47	8533.92	8733.9	8961.22	4282.55	5959.32	5674.1	6113.58	4603.55	6376.83	7391.13	7225.76
8	8482.71	15045.9	14997.3	15582.3	6095.57	9473.08	9805.04	10396.2	8784.62	13405.3	15353.3	14566	5017.16	7216.29	7087.85	7473.2	3579.25	4380.78	3885.27	4426.06	5244.57	7391.27	7499.12	7795.92	5389.04	8058.51	8950.26	9870.92	5485.44	8165.35	8513.82	9622.59	4466.71	6011.31	5872.11	6903.98	4752.06	6373.44	7535.59	8173.1
9	7651.53	12812.1	13652.3	13520.8	5780.48	8262.3	9127.8	9491.89	7935.74	11292.8	13909.5	12377	4823.28	6338.01	6721.64	6935.91	3558.77	4147.44	3868.61	4366.37	5006.73	6573.14	7173.47	7282.94	5090.32	7122.3	8468.42	8908.54	5211.38	7129.04	8019.43	8596.7	4438.76	5556.13	5871.99	6653.77	4630.65	5853.45	7385.51	7701.14
10	6691.47	12538.5	12048.3	12724.1	5342.35	8318.13	8294.85	8949.07	7036.48	10941.8	12315.6	11856.1	4656.06	6611.14	6362.92	7293.88	3530.06	4535.12	3818.48	4673.66	4893.68	7022.3	6828.22	7668.04	4699.85	7315.72	7822.5	8939.33	4821.76	7342.37	7424.52	8730.31	4349.08	6107.02	5758.28	7098.47	4472.12	6163.87	7026.18	8061.08
11	6165.56	11413	10792.5	11882.8	5053.37	7735.47	7686.71	8745.37	6469.57	9972.8	10959.2	10922.5	4446.28	6350.59	6000.8	6972.86	3523.13	4494.14	3860.99	4633.68	4655.24	6697.92	6400.49	7294.82	4465.44	6837.59	7225.38	8500.6	4563.71	6850.8	6723.64	8314.91	4252.16	5996.97	5582.27	6855.91	4315.26	5969.07	6567.4	7851.51
12	5783.02	9526.83	10140.8	11328	4957.31	6939.72	7390.31	8619.31	6067.65	8240.01	10278.7	10381.5	4454.89	5569.73	6005.68	7051.64	3503.16	4179.15	3921.99	4844.04	4548.07	5937.18	6505.69	7405.98	4344.86	5894.36	7078.64	8544.6	4392.16	5888.26	6653.16	8263.8	4212.58	5363.1	5680.98	7113.15	4292.87	5254.91	6614.27	8016.19
13	5563.57	9424.41	9237.74	9869.11	4872.08	6900.77	6990.16	7715.32	5866.84	8246.66	9455.89	8914.52	4513.76	5770.04	5732.46	6285.94	3629.32	4463.08	3933.18	4521.2	4660.81	6366	6149.57	6768.23	4320.16	5994.14	6658.48	7618.83	4410.85	6088.46	6299.38	7329.41	4366.3	5682.71	5551.63	6511.15	4359.23	5517.43	6386.66	7307
14	5261.76	8143.94	8548.88	8559.03	4634.09	6128.79	6700.49	7064.62	5464.81	7152.33	8773.19	7829.93	4461.92	5672.24	5621.94	5981.02	3612.8	4271.2	3937.85	4416.64	4471.87	6317.68	5989.82	6322.31	4201.41	5717.37	6362.01	6911.18	4277.01	6030.28	6047.91	6706.31	4305.84	5697.45	5449.82	6187.69	4282.08	5654.72	6189.56	6855.26

## Sheet: SFig. 1D
SFig. 1D	Max DOX in distal regions of reservoirs
	R1				R1+2
	1	2	3	4	1	2	3	4
R1d1	15646.1	20195.9	26054.3	16977.7	15208.3	23910.6	29041.3	18249.5
R1c	22810.3	23609.4	28203.8	23727.2	19307.2	28165.7	28306.3	28476.8
R1d2	17873.7	20276.5	25981.4	19638.5	16225.8	21729	25803.2	22962.9
R2d1	4545.03	4737.36	5132.48	4946.11	15333.3	20899.3	26970.2	22410.8
R2c	3680.86	3793.84	4028.6	4084.49	19381.2	26617.9	31252.1	28465
R2d2	3200.38	3726.94	3481.73	4626.93	15376.1	22911.7	24704.5	19034.3
R3d1	4495.79	5062.9	5535.19	4691.39	4002.76	5595.3	5093.62	6007.44
R3c	3299.57	4041.8	3775.76	4778.35	3629.32	4535.12	3937.85	4844.04
R3d2	3499.11	3857.61	3910.99	4100.49	3984.82	6883.55	5460.98	5778.91

[truncated: 6 more sheets: SFig. 3B, SFig. 4B, SFig. 4C, SFig. 5A, SFig. 5B, SFig. 5C]
